# Supplementary material for: Gene expression changes by high-polyphenols cocoa powder intake: a randomized crossover clinical study
Source: PubMed Central journal article supplement (PMC6647247; doi:10.1007/s00394-018-1736-8), 2018-06-08
Supplement: 394_2018_1736_MOESM2_ESM.pdf [file 394_2018_1736_MOESM2_ESM.pdf]

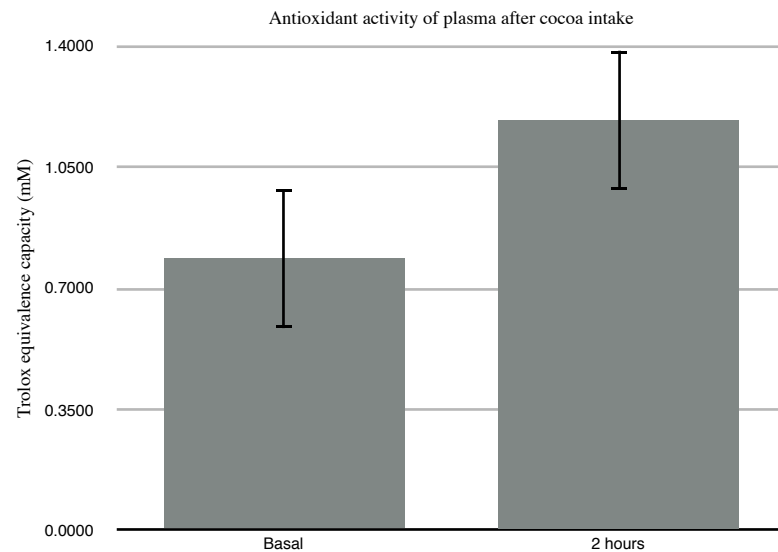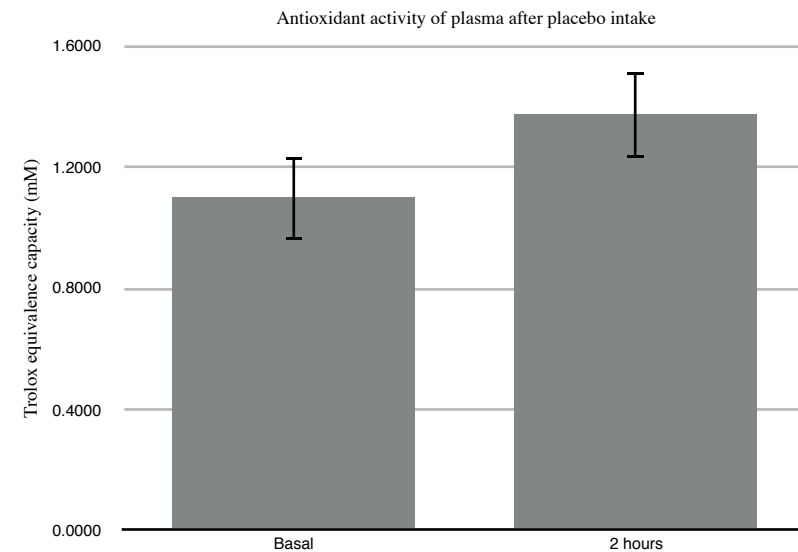

**Supplementary Fig. 2: The presence of (-)-epicatechin metabolites in plasma is not related with antioxidant activity.** Total antioxidant activity was measured in plasma samples using a commercial kit. No differences were observed in basal state and 2 h after cocoa and placebo intake. Antioxidant activity of plasma was calculated applying external calibration curves. Data analyzed by t-test for related samples and expressed as mean and standard error in a sample of n=20

### Antioxidant-related Gene Expression Changes by High-Polyphenols Cocoa Powder Intake. A Randomized Crossover Clinical Study.

#### European Journal of Nutrition

Barrera PK<sup>1</sup>, Hernández-Ramírez N<sup>1</sup>, Cortés J<sup>1</sup>, Poquet L<sup>2</sup>, Meisser Redeuil K<sup>2</sup>, Rangel-Escareño C<sup>3</sup>, Kussmann M<sup>4</sup>, Silva-Zolezzi I<sup>5</sup>, Tejero ME<sup>1\*</sup>

<sup>1</sup> Nutrigenomics and Nutrigenetics, National Institute of Genomic Medicine, 14610 Mexico City, Mexico

<sup>2</sup> Vitamins & Phytonutrients, Nestlé Research Centre, CH-1000 Lausanne, Switzerland.

<sup>3</sup> Computational Genomics, National Institute of Genomic Medicine, 14610 Mexico City, Mexico.

<sup>4</sup> Systems Nutrition, Metabonomics and Proteomics, Nestlé Institute of Health Sciences, 1015 Lausanne, Switzerland; Current affiliation: Liggins Institute, 1142 Auckland, New Zealand.

<sup>5</sup> Metabolic Programming, Nestlé Research Centre, CH-1000 Lausanne, Switzerland.

\* Correspondence: etejero@inmegen.gob.mx; Tel.: +52 (55) 5350-1145.
