# Supplementary material for: Gene expression changes by high-polyphenols cocoa powder intake: a randomized crossover clinical study
Source: Springer Nature journal article supplement (doi:10.1007/s00394-018-1736-8), 2018-06-08
Supplement: MOESM3 [file 15831470]

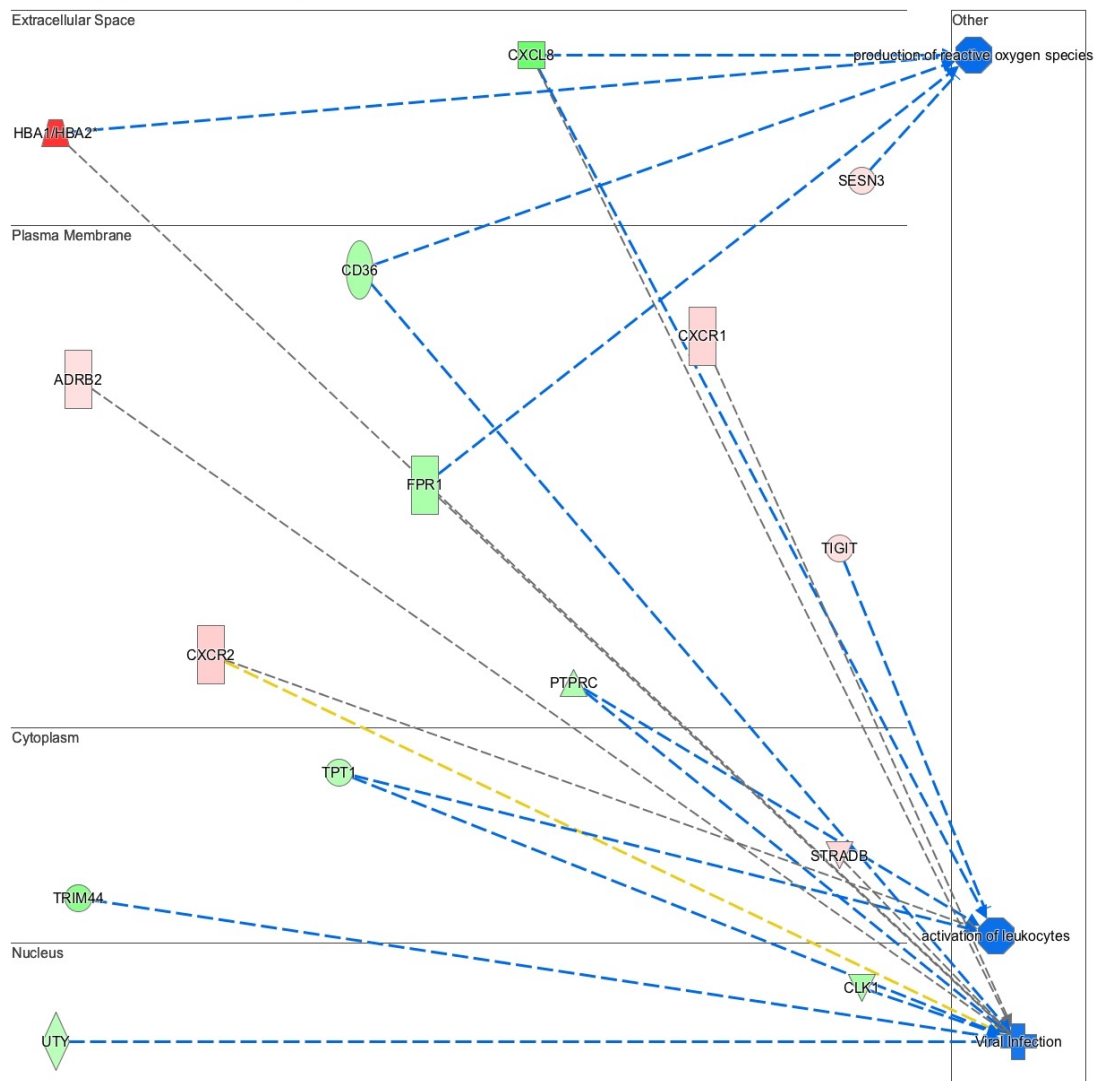

**Supplementary Fig. 3** Cellular configuration of differentially expressed genes after enrichment analysis. Three gene expression networks of annotated functions had an activation  $z$ -score  $< -1.5$  or  $> 1.5$ ; Production of reactive oxygen species (ROS) ( $p=9.58E-4$ ;  $z$ -score=  $-2.216$ ); Activation of leukocytes ( $p=4E-3$ ;  $z$ -score=  $-1.966$ ); and, Viral infection ( $p=2.72E-2$ ;  $z$ -score=  $-1.667$ )

**Gene Expression Changes by High-Polyphenols Cocoa Powder Intake. A Randomized Crossover Clinical Study.**  
**European Journal of Nutrition**

Barrera-Reyes PK<sup>1</sup>, Hernández-Ramírez N<sup>1</sup>, Cortés J<sup>1</sup>, Poquet L<sup>2</sup>, Meisser Redeuil K<sup>2</sup>, Rangel-Escareño C<sup>3</sup>, Kussmann M<sup>4</sup>, Silva-Zolezzi I<sup>5</sup>, Tejero ME<sup>1\*</sup>

<sup>1</sup> Nutrigenomics and Nutrigenetics, National Institute of Genomic Medicine, 14610 Mexico City, Mexico

<sup>2</sup> Vitamins & Phytonutrients, Nestlé Research Centre, CH-1000 Lausanne, Switzerland.

<sup>3</sup> Computational Genomics, National Institute of Genomic Medicine, 14610 Mexico City, Mexico.

<sup>4</sup> Systems Nutrition, Metabonomics and Proteomics, Nestlé Institute of Health Sciences, 1015 Lausanne, Switzerland; Current affiliation: Liggins Institute, 1142 Auckland, New Zealand.

<sup>5</sup> Metabolic Programming, Nestlé Research Centre, CH-1000 Lausanne, Switzerland.

\* Correspondence: etejero@inmegen.gob.mx; Tel.: +52 (55) 5350-1145.
