# Supplementary material for: Gene expression changes by high-polyphenols cocoa powder intake: a randomized crossover clinical study
Source: Springer Nature journal article supplement (doi:10.1007/s00394-018-1736-8), 2018-06-08
Supplement: MOESM4 [file 15831470]

Supplementary Table 1A Differentially expressed genes after cocoa intake

| Log Ratio | p-value  | ID        | Symbol                  | Entrez Gene Name                                              | Location            | Type(s)                    |
|-----------|----------|-----------|-------------------------|---------------------------------------------------------------|---------------------|----------------------------|
| 0.33      | 3.83E-03 | FAM108C1  | ABHD17C                 | abhydrolase domain containing 17C                             | Other               | enzyme                     |
| 0.347     | 6.54E-03 | ADRB2     | ADRB2                   | adrenoreceptor beta 2                                         | Plasma Membrane     | G-protein coupled receptor |
| 1.885     | 1.37E-06 | AHSP      | AHSP                    | alpha hemoglobin stabilizing protein                          | Cytoplasm           | other                      |
| 3.182     | 7.9E-07  | ALAS2     | ALAS2                   | 5'-aminolevulinatase synthase 2                               | Cytoplasm           | enzyme                     |
| -0.312    | 5.99E-03 | ANKRD54   | ANKRD54                 | ankyrin repeat domain 54                                      | Nucleus             | transcription regulator    |
| 0.359     | 7.7E-03  | ARHGAP17  | ARHGAP17                | Rho GTPase activating protein 17                              | Cytoplasm           | other                      |
| 1.099     | 6.95E-05 | CA1       | CA1                     | carbonic anhydrase 1                                          | Cytoplasm           | enzyme                     |
| -0.508    | 6.9E-03  | CAPG      | CAPG                    | capping actin protein, gelsolin like                          | Nucleus             | other                      |
| -0.396    | 5.09E-03 | CD36      | CD36                    | CD36 molecule                                                 | Plasma Membrane     | transmembrane receptor     |
| 0.306     | 7.88E-03 | CETN1     | CETN1                   | centrin 1                                                     | Nucleus             | enzyme                     |
| -0.319    | 4.57E-03 | CKAP4     | CKAP4                   | cytoskeleton associated protein 4                             | Cytoplasm           | other                      |
| -0.41     | 2.38E-03 | CLK1      | CLK1                    | CDC like kinase 1                                             | Nucleus             | kinase                     |
| -0.455    | 9.52E-03 | COTL1     | COTL1                   | coactosin like F-actin binding protein 1                      | Cytoplasm           | other                      |
| -0.688    | 7.36E-03 | IL8       | CXCL8                   | C-X-C motif chemokine ligand 8                                | Extracellular Space | cytokine                   |
| 0.734     | 6.84E-03 | CXCR1     | CXCR1                   | C-X-C motif chemokine receptor 1                              | Plasma Membrane     | G-protein coupled receptor |
| 0.869     | 6.13E-04 | IL8RB     | CXCR2                   | C-X-C motif chemokine receptor 2                              | Plasma Membrane     | G-protein coupled receptor |
| 0.49      | 2.77E-03 | WDR40A    | DCAF12                  | DDB1 and CUL4 associated factor 12                            | Cytoplasm           | other                      |
| 0.401     | 7.85E-03 | DDR1      | DDR1                    | discoidin domain receptor tyrosine kinase 1                   | Plasma Membrane     | kinase                     |
| 1.214     | 4.36E-06 | EPB42     | EPB42                   | erythrocyte membrane protein band 4.2                         | Plasma Membrane     | transporter                |
| 0.557     | 8.72E-04 | FAM46C    | FAM46C                  | family with sequence similarity 46 member C                   | Extracellular Space | other                      |
| -0.396    | 8.07E-03 | FPR1      | FPR1                    | formyl peptide receptor 1                                     | Plasma Membrane     | G-protein coupled receptor |
| 0.316     | 9.34E-03 | GFI1      | GFI1                    | growth factor independent 1 transcriptional repressor         | Nucleus             | transcription regulator    |
| 0.436     | 4.11E-03 | GYPE      | GYPE                    | glycophorin E (MNS blood group)                               | Plasma Membrane     | other                      |
| 3.707     | 2.24E-05 | HBA1      | HBA1/HBA2               | hemoglobin subunit alpha 2                                    | Extracellular Space | transporter                |
| 1.729     | 1.34E-03 | HBA2      | HBA1/HBA2               | hemoglobin subunit alpha 2                                    | Extracellular Space | transporter                |
| 1.581     | 5.9E-04  | HBA2      | HBA1/HBA2               | hemoglobin subunit alpha 2                                    | Extracellular Space | transporter                |
| 2.202     | 3.99E-06 | HBD       | HBD                     | hemoglobin subunit delta                                      | Other               | transporter                |
| 2.137     | 5.48E-05 | HBE1      | HBE1                    | hemoglobin subunit epsilon 1                                  | Cytoplasm           | transporter                |
| 1.582     | 3.43E-04 | HBM       | HBM                     | hemoglobin subunit mu                                         | Cytoplasm           | other                      |
| 0.73      | 3.78E-03 | IFT11L    | IFT11B                  | interferon induced protein with tetratricopeptide repeats 1B  | Cytoplasm           | other                      |
| -0.436    | 2.08E-03 | HS.552896 | KCNC1                   | potassium voltage-gated channel subfamily C member 1          | Plasma Membrane     | ion channel                |
| 0.748     | 1.37E-03 | KCNG1     | KCNG1                   | potassium voltage-gated channel modifier subfamily G member 1 | Plasma Membrane     | ion channel                |
| -0.395    | 3.67E-03 | KREMEN2   | KREMEN2                 | kringle containing transmembrane protein 2                    | Other               | other                      |
| 0.323     | 5.3E-03  | KRTAP9-5  | KRTAP9-9                | keratin associated protein 9-9                                | Cytoplasm           | other                      |
| 0.396     | 7.87E-03 | LARGE     | LARGE1                  | LARGE xylosyl- and glucuronyltransferase 1                    | Cytoplasm           | enzyme                     |
| 0.798     | 8.36E-03 | LOC440313 | LOC440313               | protein enabled homolog                                       | Other               | other                      |
| -0.405    | 1.45E-03 | LRRN3     | LRRN3                   | leucine rich repeat neuronal 3                                | Extracellular Space | other                      |
| -0.428    | 2.39E-03 | MGST1     | MGST1                   | microsomal glutathione S-transferase 1                        | Cytoplasm           | enzyme                     |
| -0.42     | 1.47E-03 | MIIIP     | MIIIP                   | migration and invasion inhibitory protein                     | Other               | other                      |
| -0.448    | 3.68E-03 | MPZL2     | MPZL2                   | myelin protein zero like 2                                    | Plasma Membrane     | other                      |
| -0.364    | 9.08E-03 | MS4A6A    | MS4A6A                  | membrane spanning 4-domains A6A                               | Other               | other                      |
| 0.805     | 3.37E-04 | MUC6      | MUC6                    | mucin 6, oligomeric mucus/gel-forming                         | Extracellular Space | other                      |
| 0.422     | 3.05E-03 | MYO1B     | MYO1B                   | myosin 1B                                                     | Cytoplasm           | enzyme                     |
| 0.338     | 4.98E-03 | NIPAL4    | NIPAL4                  | NIPA like domain containing 4                                 | Other               | other                      |
| 0.311     | 9.24E-03 | NUAK2     | NUAK2                   | NUAK family kinase 2                                          | Other               | kinase                     |
| 0.466     | 2.38E-03 | ORM1      | ORM1                    | orosomucoid 1                                                 | Extracellular Space | other                      |
| -0.398    | 1.76E-03 | OSBPL8    | OSBPL8                  | oxysterol binding protein like 8                              | Plasma Membrane     | transporter                |
| -0.506    | 3.06E-03 | PFDN6     | PFDN6                   | prefoldin subunit 6                                           | Cytoplasm           | other                      |
| 0.432     | 6.36E-03 | PKHD1     | PKHD1                   | PKHD1, fibrocystin/polyductin                                 | Plasma Membrane     | other                      |
| 0.407     | 3.61E-03 | PPAPDC1B  | PLPP5                   | phospholipid phosphatase 5                                    | Other               | phosphatase                |
| -0.314    | 4.55E-03 | A26C3     | POTEG (includes others) | POTE ankyrin domain family member G                           | Other               | other                      |
| -0.372    | 7.35E-03 | PTPRC     | PTPRC                   | protein tyrosine phosphatase, receptor type C                 | Plasma Membrane     | phosphatase                |
| 0.46      | 8.2E-03  | RAP1GAP   | RAP1GAP                 | RAP1 GTPase activating protein                                | Cytoplasm           | other                      |
| 1.019     | 1.22E-03 | RNF213    | RNF213                  | ring finger protein 213                                       | Cytoplasm           | enzyme                     |
| -0.905    | 9.09E-03 | RNU1G2    | RNU1-4                  | RNA, U1 small nuclear 4                                       | Other               | other                      |
| -0.582    | 6.15E-03 | RPPH1     | RPPH1                   | ribonuclease P RNA component H1                               | Other               | other                      |
| 0.644     | 2.31E-04 | SELENBP1  | SELENBP1                | selenium binding protein 1                                    | Cytoplasm           | other                      |
| 1.161     | 1.66E-03 | SERPINA13 | SERPINA13P              | serpin family A member 13, pseudogene                         | Extracellular Space | other                      |
| 0.428     | 3.99E-03 | SESN3     | SESN3                   | sestrin 3                                                     | Extracellular Space | other                      |
| 0.933     | 6.73E-03 | SLC25A37  | SLC25A37                | solute carrier family 25 member 37                            | Cytoplasm           | transporter                |
| 0.635     | 3.67E-03 | SLC25A39  | SLC25A39                | solute carrier family 25 member 39                            | Cytoplasm           | other                      |
| 0.421     | 7.25E-03 | RUNDC2C   | SNX29P2                 | sorting nexin 29 pseudogene 2                                 | Other               | other                      |
| 0.676     | 4.15E-04 | STRADB    | STRADB                  | STE20-related kinase adaptor beta                             | Cytoplasm           | kinase                     |
| 0.376     | 7.26E-03 | TGFBR3    | TGFBR3                  | transforming growth factor beta receptor 3                    | Plasma Membrane     | kinase                     |
| 0.35      | 5.64E-03 | TIGIT     | TIGIT                   | T-cell immunoreceptor with Ig and ITIM domains                | Plasma Membrane     | other                      |

|        |          |              |         |                                                                        |                 |                            |
|--------|----------|--------------|---------|------------------------------------------------------------------------|-----------------|----------------------------|
| -0.32  | 8.1E-03  | TMEM165      | TMEM165 | transmembrane protein 165                                              | Plasma Membrane | other                      |
| 0.714  | 8.4E-03  | GPR175       | TPRA1   | transmembrane protein adipocyte associated 1                           | Plasma Membrane | G-protein coupled receptor |
| -0.35  | 9.36E-03 | TPT1         | TPT1    | tumor protein, translationally-controlled 1                            | Cytoplasm       | other                      |
| -0.541 | 5.43E-03 | TRIM44       | TRIM44  | tripartite motif containing 44                                         | Cytoplasm       | other                      |
| 0.512  | 7.14E-03 | TSPAN5       | TSPAN5  | tetraspanin 5                                                          | Plasma Membrane | other                      |
| -0.389 | 6.43E-03 | UGCG         | UGCG    | UDP-glucose ceramide glucosyltransferase                               | Cytoplasm       | enzyme                     |
| -0.501 | 6.5E-03  | UIMC1        | UIMC1   | ubiquitin interaction motif containing 1                               | Nucleus         | other                      |
| -0.315 | 5.18E-03 | UTY          | UTY     | ubiquitously transcribed tetratricopeptide repeat containing, Y-linked | Nucleus         | enzyme                     |
| -0.734 | 1.75E-03 | ZADH2        | ZADH2   | zinc binding alcohol dehydrogenase domain containing 2                 | Cytoplasm       | enzyme                     |
| -1.054 | 4.12E-04 | ZNF573       | ZNF573  | zinc finger protein 573                                                | Nucleus         | other                      |
| 1.181  | 1.94E-05 | LOC100131164 |         | <i>Not identified</i>                                                  |                 |                            |
| 0.95   | 9.81E-04 | LOC644852    |         | <i>Not identified</i>                                                  |                 |                            |
| 0.652  | 2.16E-03 | LOC389599    |         | <i>Not identified</i>                                                  |                 |                            |
| 0.609  | 1.97E-03 | LOC283663    |         | <i>Not identified</i>                                                  |                 |                            |
| -0.599 | 8.25E-03 | LOC100129882 |         | <i>Not identified</i>                                                  |                 |                            |
| 0.576  | 3.12E-03 | LOC100131391 |         | <i>Not identified</i>                                                  |                 |                            |
| 0.56   | 8.3E-03  | LOC642469    |         | <i>Not identified</i>                                                  |                 |                            |
| -0.375 | 3.57E-03 | LOC399804    |         | <i>Not identified</i>                                                  |                 |                            |
| -0.357 | 8.91E-03 | LOC645351    |         | <i>Not identified</i>                                                  |                 |                            |
| 0.348  | 8.6E-03  | LOC644012    |         | <i>Not identified</i>                                                  |                 |                            |
| 0.322  | 8.73E-03 | HS.527387    |         | <i>Not identified</i>                                                  |                 |                            |
| 0.315  | 5.22E-03 | C1ORF183     |         | <i>Not identified</i>                                                  |                 |                            |
| 0.315  | 9.78E-03 | LOC374491    |         | <i>Not identified</i>                                                  |                 |                            |
| -0.311 | 4.8E-03  | HS.545536    |         | <i>Not identified</i>                                                  |                 |                            |
| -0.306 | 7.07E-03 | HS.578383    |         | <i>Not identified</i>                                                  |                 |                            |
| 0.306  | 4.19E-03 | LOC391347    |         | <i>Not identified</i>                                                  |                 |                            |
| -1.045 | 4.37E-03 | RNU1-5       |         | <i>Not identified</i>                                                  |                 |                            |
| 0.393  | 1.92E-03 | LOC649185    |         | <i>Not identified</i>                                                  |                 |                            |
| 0.351  | 9.59E-03 | LOC100132506 |         | <i>Not identified</i>                                                  |                 |                            |
| 0.343  | 2.56E-03 | C1ORF21      |         | <i>Not identified</i>                                                  |                 |                            |
| 0.331  | 5.06E-03 | LOC648879    |         | <i>Not identified</i>                                                  |                 |                            |
| -0.304 | 4.73E-03 | LOC728505    |         | <i>Not identified</i>                                                  |                 |                            |
| -0.303 | 5.83E-03 | LOC729992    |         | <i>Not identified</i>                                                  |                 |                            |

Supplementary Table 1B Differentially expressed genes after placebo intake

| Log Ratio | p-value  | ID            | Symbol   | Entrez Gene Name                                              | Location        | Type(s)                    |
|-----------|----------|---------------|----------|---------------------------------------------------------------|-----------------|----------------------------|
| 0.467     | 7.9E-03  | AP2B1         | AP2B1    | adaptor related protein complex 2 beta 1 subunit              | Plasma Membrane | transporter                |
| 0.343     | 9.22E-03 | CACNA2D3      | CACNA2D3 | calcium voltage-gated channel auxiliary subunit alpha2delta 3 | Plasma Membrane | ion channel                |
| 0.63      | 2.53E-03 | CTSZ          | CTSZ     | cathepsin Z                                                   | Cytoplasm       | peptidase                  |
| -0.364    | 7.08E-03 | CXCR4         | CXCR4    | C-X-C motif chemokine receptor 4                              | Plasma Membrane | G-protein coupled receptor |
| 0.374     | 5.34E-03 | DLG4          | DLG4     | discs large MAGUK scaffold protein 4                          | Plasma Membrane | kinase                     |
| 0.404     | 8.73E-03 | ERH           | ERH      | enhancer of rudimentary homolog (Drosophila)                  | Nucleus         | other                      |
| 0.472     | 7.26E-04 | G6PD          | G6PD     | glucose-6-phosphate dehydrogenase                             | Cytoplasm       | enzyme                     |
| 0.407     | 5.77E-03 | GTF2H4        | GTF2H4   | general transcription factor IIH subunit 4                    | Nucleus         | transcription regulator    |
| 0.391     | 5.68E-03 | MEPCE         | MEPCE    | methylphosphate capping enzyme                                | Other           | enzyme                     |
| -0.422    | 6.13E-03 | PRR13         | PRR13    | proline rich 13                                               | Nucleus         | other                      |
| -0.318    | 4.61E-03 | RBM3          | RBM3     | RNA binding motif (RNP1, RRM) protein 3                       | Cytoplasm       | other                      |
| 0.62      | 6.15E-03 | UBE2E1        | UBE2E1   | ubiquitin conjugating enzyme E2 E1                            | Cytoplasm       | enzyme                     |
| -0.455    | 4.29E-03 | LOC389049     |          | <i>Not identified</i>                                         |                 |                            |
| 0.519     | 5.21E-03 | DKFZP781G0119 |          | <i>Not identified</i>                                         |                 |                            |
| -0.38     | 7.43E-03 | LOC643452     |          | <i>Not identified</i>                                         |                 |                            |
| 0.312     | 8.37E-03 | LOC554208     |          | <i>Not identified</i>                                         |                 |                            |
| -0.31     | 5.25E-03 | LOC653257     |          | <i>Not identified</i>                                         |                 |                            |
| 0.335     | 3.94E-03 | LOC100130884  |          | <i>Not identified</i>                                         |                 |                            |

#### Gene Expression Changes by High-Polyphenols Cocoa Powder Intake. A Randomized Crossover Clinical Study.

European Journal of Nutrition

Barrera-Reyes PK<sup>1</sup>, Hernández-Ramírez N<sup>1</sup>, Cortés J<sup>1</sup>, Poquet L<sup>2</sup>, Meisser Redeuil K<sup>2</sup>, Rangel-Escareño C<sup>3</sup>, Kussmann M<sup>4</sup>, Silva-Zolezzi I<sup>5</sup>, Tejero ME<sup>1\*</sup>

<sup>1</sup>Nutrigenomics and Nutrigenetics, National Institute of Genomic Medicine, 14610 Mexico City, Mexico

<sup>2</sup>Vitamins & Phytonutrients, Nestlé Research Centre, CH-1000 Lausanne, Switzerland.

<sup>3</sup>Computational Genomics, National Institute of Genomic Medicine, 14610 Mexico City, Mexico.

<sup>4</sup>Systems Nutrition, Metabonomics and Proteomics, Nestlé Institute of Health Sciences, 1015 Lausanne, Switzerland; Current affiliation: Liggins Institute, 1142 Auckland, New Zealand.

<sup>5</sup>Metabolic Programming, Nestlé Research Centre, CH-1000 Lausanne, Switzerland.

\* Correspondence: etejero@inmegen.gob.mx; Tel.: +52 (55) 5350-1145.
