# Supplementary material for: Gene expression changes by high-polyphenols cocoa powder intake: a randomized crossover clinical study
Source: Springer Nature journal article supplement (doi:10.1007/s00394-018-1736-8), 2018-06-08
Supplement: MOESM5 [file 15831470]

**Supplementary Table 2A: Functional Enrichment Pathways Modulated After Cocoa Intake**

| Category                                                                                                                              | Functions Annotation                     | p-Value  | Activation z-score | Molecules                                                                    | # Molecules |
|---------------------------------------------------------------------------------------------------------------------------------------|------------------------------------------|----------|--------------------|------------------------------------------------------------------------------|-------------|
| Free Radical Scavenging                                                                                                               | Production of reactive oxygen species    | 9.58E-04 | -2.216             | CD36,CXCL8,FPR1,HBA1/HBA2,SESN3                                              | 5           |
| Cell-To-Cell Signaling and Interaction, Hematological System Development and Function, Immune Cell Trafficking, Inflammatory Response | Activation of leukocytes                 | 4E-03    | -1.966             | CXCL8,CXCR2,PTPRC,TIGIT,TPT1                                                 | 5           |
| Infectious Diseases                                                                                                                   | Viral Infection                          | 2.72E-02 | -1.667             | CD36,CLK1,CXCL8,CXCR1,CXCR2,FPR1,HBA1/HBA2,HBE1,PTPRC,STRADB,TPT1,TRIM44,UTY | 13          |
| Lipid Metabolism, Small Molecule Biochemistry                                                                                         | Synthesis of lipid                       | 3.02E-02 | -1.462             | COTL1,CXCL8,FPR1,LARGE,UGCG                                                  | 5           |
| Cell-To-Cell Signaling and Interaction                                                                                                | Activation of cells                      | 6.11E-03 | -1.418             | CXCL8,CXCR1,CXCR2,PTPRC,TIGIT,TPT1                                           | 6           |
| Lipid Metabolism, Small Molecule Biochemistry                                                                                         | Fatty acid metabolism                    | 6.83E-04 | -1.004             | CD36,COTL1,CXCL8,FPR1,LARGE,OSBPL8,UGCG                                      | 7           |
| Cell Morphology                                                                                                                       | Cell spreading                           | 3.57E-03 | -0.958             | CD36,CXCL8,CXCR2,RAP1GAP                                                     | 4           |
| Cellular Movement                                                                                                                     | Migration of cells                       | 2.27E-02 | -0.818             | ADRB2,CD36,CXCL8,CXCR1,CXCR2,DDR1,FPR1,ORM1,RAP1GAP,TGFBR3,TPT1              | 11          |
| Cell-To-Cell Signaling and Interaction                                                                                                | Binding of cells                         | 2.57E-03 | -0.806             | CD36,CXCL8,CXCR1,CXCR2,ORM1,RAP1GAP                                          | 6           |
| Cellular Movement, Immune Cell Trafficking                                                                                            | Leukocyte migration                      | 1.61E-02 | -0.563             | CXCL8,CXCR1,CXCR2,DDR1,FPR1                                                  | 5           |
| Cell-To-Cell Signaling and Interaction                                                                                                | Binding of blood cells                   | 1.53E-04 | -0.515             | CXCL8,CXCR1,CXCR2,ORM1,RAP1GAP                                               | 5           |
| Cell Signaling, Molecular Transport, Vitamin and Mineral Metabolism                                                                   | Mobilization of Ca <sup>2+</sup>         | 3.62E-05 | -0.464             | ADRB2,CXCL8,CXCR1,CXCR2,FPR1,PTPRC,TPT1                                      | 7           |
| Inflammatory Response                                                                                                                 | Inflammatory response                    | 1.28E-02 | -0.299             | CXCL8,CXCR1,CXCR2,FPR1,ORM1                                                  | 5           |
| Cellular Movement, Hematological System Development and Function, Immune Cell Trafficking, Inflammatory Response                      | Chemotaxis of mononuclear leukocytes     | 1.92E-03 | -0.278             | CXCL8,CXCR1,CXCR2,FPR1                                                       | 4           |
| Cell Death and Survival                                                                                                               | Apoptosis of leukemia cell lines         | 3.63E-02 | -0.277             | GF11,PTPRC,TPT1,UGCG                                                         | 4           |
| Cellular Movement                                                                                                                     | Cell movement of blood cells             | 3.66E-03 | -0.259             | CD36,CXCL8,CXCR1,CXCR2,DDR1,FPR1                                             | 6           |
| Cellular Movement                                                                                                                     | Chemotaxis of cells                      | 1.4E-02  | -0.227             | CD36,CXCL8,CXCR1,CXCR2,FPR1                                                  | 5           |
| Cell-To-Cell Signaling and Interaction, Hematological System Development and Function, Inflammatory Response                          | Binding of professional phagocytic cells | 5.29E-05 | -0.211             | CXCL8,CXCR1,CXCR2,ORM1                                                       | 4           |
| Cell-To-Cell Signaling and Interaction                                                                                                | Adhesion of blood cells                  | 2.23E-04 | -0.2               | ADRB2,CD36,CXCL8,CXCR1,CXCR2,ORM1                                            | 6           |
| Cellular Movement, Hematological System Development and Function, Immune Cell Trafficking, Inflammatory Response                      | Chemotaxis of neutrophils                | 3.13E-04 | -0.153             | CXCL8,CXCR1,CXCR2,FPR1                                                       | 4           |
| Cell-To-Cell Signaling and Interaction                                                                                                | Binding of tumor cell lines              | 4.16E-03 | -0.152             | CD36,CXCR1,CXCR2,RAP1GAP                                                     | 4           |
| Cell-To-Cell Signaling and Interaction, Hematological System Development and Function, Immune Cell Trafficking                        | Adhesion of immune cells                 | 6E-03    | -0.121             | CXCL8,CXCR1,CXCR2,ORM1                                                       | 4           |
| Cardiovascular System Development and Function, Cellular Movement                                                                     | Chemotaxis of endothelial cell lines     | 1.57E-07 | -0.102             | CD36,CXCL8,CXCR1,CXCR2                                                       | 4           |
| Cellular Development, Hematological System Development and Function                                                                   | Differentiation of blood cells           | 4.15E-02 | 0                  | CXCL8,CXCR1,CXCR2,PTPRC                                                      | 4           |
| Cellular Movement                                                                                                                     | Cell movement                            | 2.08E-02 | 0.082              | ADRB2,CD36,CXCL8,CXCR1,CXCR2,DDR1,FPR1,NUAK2,ORM1,RAP1GAP,TGFBR3,TPT1        | 12          |
| Cellular Movement                                                                                                                     | Transmigration of cells                  | 3.92E-04 | 0.343              | CXCL8,CXCR2,FPR1,RAP1GAP                                                     | 4           |
| Cardiovascular System Development and Function, Cellular Movement                                                                     | Movement of vascular endothelial cells   | 2.56E-03 | 0.528              | CD36,CXCL8,CXCR2,ORM1                                                        | 4           |
| Cardiovascular System Development and Function, Cellular Movement                                                                     | Migration of endothelial cells           | 1.62E-02 | 0.927              | CXCL8,CXCR1,CXCR2,ORM1                                                       | 4           |
| Cardiovascular System Development and Function, Cellular Movement                                                                     | Cell movement of endothelial cells       | 4.06E-03 | 0.987              | CD36,CXCL8,CXCR1,CXCR2,ORM1                                                  | 5           |
| Cell Signaling, Molecular Transport, Vitamin and Mineral Metabolism                                                                   | Quantity of Ca <sup>2+</sup>             | 2.51E-05 | 1.047              | CXCL8,CXCR1,CXCR2,FPR1,HBA1/HBA2,ORM1,PTPRC                                  | 7           |

**Supplementary Table 2B: Functional Enrichment Pathways Modulated After Placebo Intake**

| Category            | Functions Annotation          | p-Value  | Activation z-score | Molecules                        | # Molecules |
|---------------------|-------------------------------|----------|--------------------|----------------------------------|-------------|
| Infectious Diseases | Infection by RNA virus        | 4.58E-04 | 0.471              | AP2B1,CACNA2D3,CTSZ,CXCR4,UBE2E1 | 5           |
| Infectious Diseases | Infection of tumor cell lines | 6.24E-04 | 0.594              | AP2B1,CTSZ,CXCR4,UBE2E1          | 4           |

**Gene Expression Changes by High-Polyphenols Cocoa Powder Intake. A Randomized Crossover Clinical Study.**

**European Journal of Nutrition**

**Barrera-Reyes PK<sup>1</sup>, Hernández-Ramírez N<sup>1</sup>, Cortés J<sup>1</sup>, Poquet L<sup>2</sup>, Meisser Redeuil K<sup>2</sup>, Rangel-Escareño C<sup>3</sup>, Kussmann M<sup>4</sup>, Silva-Zolezzi I<sup>5</sup>, Tejero ME<sup>1\*</sup>**

<sup>1</sup> Nutrigenomics and Nutrigenetics, National Institute of Genomic Medicine, 14610 Mexico City, Mexico

<sup>2</sup> Vitamins & Phytonutrients, Nestlé Research Centre, CH-1000 Lausanne, Switzerland.

<sup>3</sup> Computational Genomics, National Institute of Genomic Medicine, 14610 Mexico City, Mexico.

<sup>4</sup> Systems Nutrition, Metabonomics and Proteomics, Nestlé Institute of Health Sciences, 1015 Lausanne, Switzerland; Current affiliation: Liggins Institute, 1142 Auckland, New Zealand.

<sup>5</sup> Metabolic Programming, Nestlé Research Centre, CH-1000 Lausanne, Switzerland.

\* Correspondence: etejero@inmegen.gob.mx; Tel.: +52 (55) 5350-1145.
